# Supplementary material
Source: bioRxiv or medRxiv preprint supplement (https://medrxiv.org/highwire/filestream/96930/field_highwire_adjunct_files/0/2020.06.27.20141002-1.pdf)
Supplement: Supplementary file [file 2020.06.27.20141002-1.pdf]

## Modeling the Coronavirus Disease 2019 Incubation Period: Impact on Quarantine Policy

Patients with starting date of exposure available (n=111)

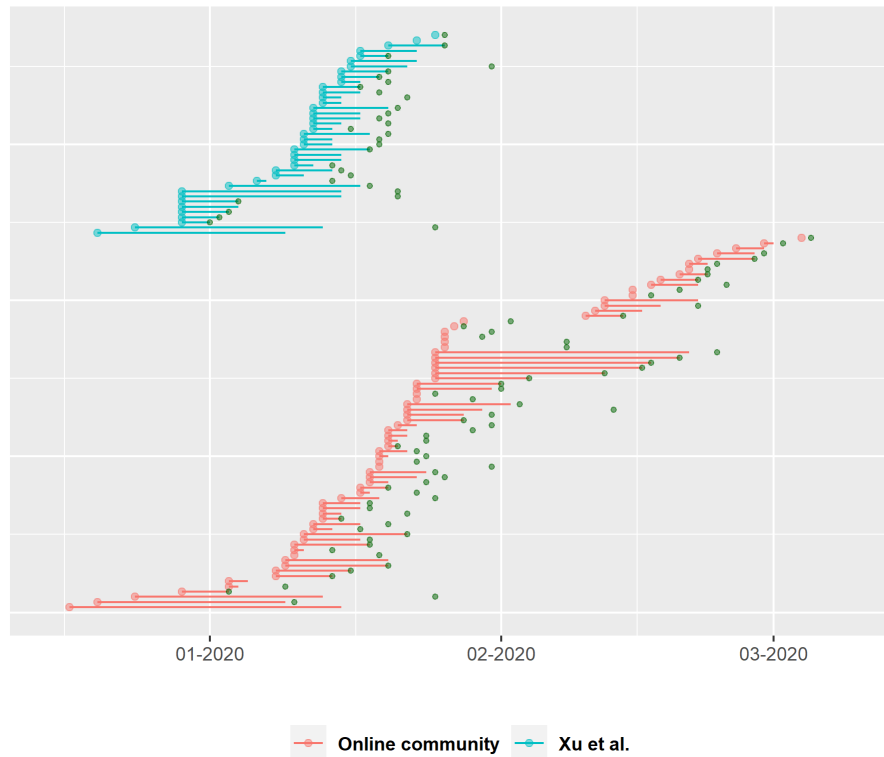

Figure S1. Segments represent the exposure period for online community from DXY [6] (red, n=69) and Xu et al [7] (blue, n=39). Dark green points represent the symptoms onset, when available.

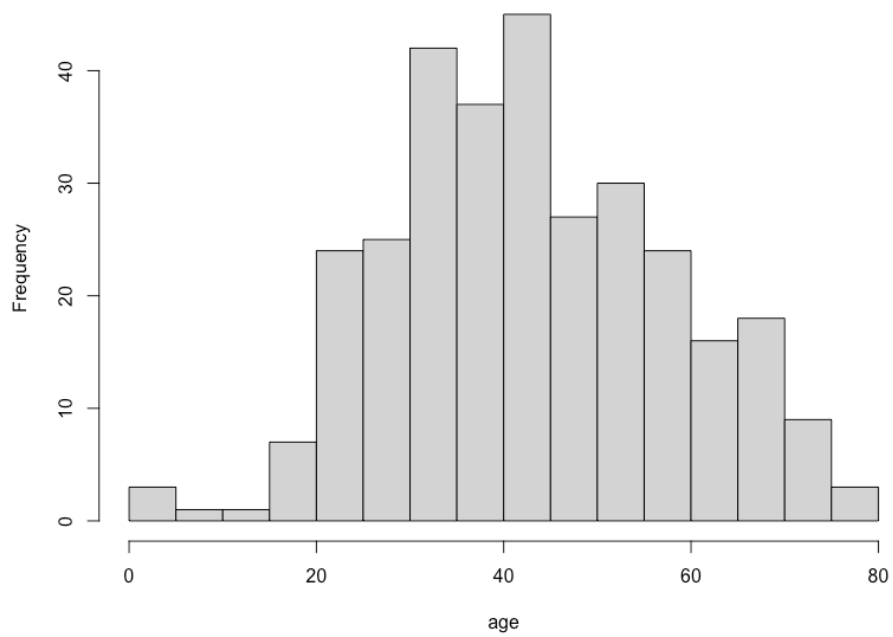

Figure S2. Histogram of patient's age

Table S1. Summary of patient's age

|         | Min | Q1    | Median | Mean  | Q3 | Max |
|---------|-----|-------|--------|-------|----|-----|
| Overall | 2   | 33    | 42     | 43.64 | 55 | 80  |
| Male    | 10  | 34.12 | 43     | 43.99 | 55 | 80  |
| Female  | 2   | 32    | 42     | 43.13 | 55 | 77  |

Table S2. Parameter estimation with age as a continuous variable

|          | $\log(\lambda)$ | $\log(\phi)$ | $\log(\rho)$ | $\beta_{male}$ | $\beta_{age}$ |
|----------|-----------------|--------------|--------------|----------------|---------------|
| Estimate | 0.917           | 0.604        | -0.566       | -0.569         | -0.029        |
| SE       | 0.314           | 0.219        | 0.751        | 0.336          | 0.011         |
| P-value  | 0.003           | 0.006        | 0.451        | 0.091          | 0.007         |

Table S3. Estimated difference in the incubation period between two age groups (patients aged > 42 years – patients aged ≤42 years) at each percentile by changing the maximum exposure duration to 20 days (scenario I), and by shifting the lower bound for the starting date of exposure to December 15, 2019 (scenario II) and to November 15, 2019 (scenario III)

| Scenario | Percentile        |                  |                  |                  |                    |
|----------|-------------------|------------------|------------------|------------------|--------------------|
|          | 2.5 <sup>th</sup> | 25 <sup>th</sup> | 50 <sup>th</sup> | 75 <sup>th</sup> | 97.5 <sup>th</sup> |
| I        | 0.1 (0, 0.3)      | 0.7 (0, 1.4)     | 1.3 (0.0, 2.6)   | 2.2 (0.1, 4.3)   | 4.4 (0.1, 8.7)     |
| II       | 0.1 (0, 0.3)      | 0.9 (0, 1.7)     | 1.7 (0.1, 3.2)   | 2.8 (0.2, 5.4)   | 5.8 (0.3, 11.2)    |
| III      | 0.2 (0, 0.4)      | 1.0 (0.1, 1.8)   | 1.7 (0.2, 3.3)   | 2.9 (0.3, 5.4)   | 6.7 (0.6, 12.8)    |

Table S4. Summary of two datasets from DXY [6] and Xu et al [7]

| Source*  | Age | Gender |      | Total |
|----------|-----|--------|------|-------|
|          |     | Female | Male |       |
| DXY      | ≤42 | 40     | 56   | 96    |
|          | >42 | 25     | 42   | 67    |
| Xu et al | ≤42 | 42     | 69   | 111   |
|          | >42 | 30     | 42   | 72    |

\*Two sources have 34 duplicated cases (22 for age ≤42 and 12 for age >42).

Table S5. Parameter estimation from separate data sets

| Source       |          | $\log(\lambda)$ | $\log(\phi)$ | $\log(\rho)$ | $\beta_{male}$ | $\beta_{age\leq 42}$ |
|--------------|----------|-----------------|--------------|--------------|----------------|----------------------|
| DXY [6]      | Estimate | 1.773           | 0.624        | -1.226       | -0.325         | 0.630                |
|              | SE       | 0.179           | 0.173        | 0.884        | 0.296          | 0.306                |
|              | P-value  | <0.001          | <0.001       | 0.165        | 0.272          | 0.039                |
| Xu et al [7] | Estimate | 2.580           | 0.469        | -2.173       | 0.400          | 0.370                |
|              | SE       | 0.158           | 0.123        | 1.169        | 0.263          | 0.265                |
|              | P-value  | <0.001          | <0.001       | 0.063        | 0.129          | 0.162                |
